# Supplementary material for: Operating envelope of Haber–Bosch process design for power-to-ammonia
Source: Royal Society of Chemistry journal article supplement (doi:10.1039/c8ra06821f), 2018-01-01
Supplement: c8ra06821f1.pdf [file c8ra06821f1.pdf]

### Operating Envelope of Haber-Bosch Process Design for Power-to-Ammonia<sup>‡</sup>

Izzat Iqbal Cheema<sup>abc</sup> and Ulrike Krewer<sup>\*a</sup>

#### S.1 Heat Exchanger

For shell and tube heat exchanger, effectiveness  $\varepsilon$  is calculated as:<sup>1</sup>

$$\varepsilon = \frac{2}{1 + C^* + \sqrt{1 + C^{*2}}} \frac{1 + \exp[-NTU\sqrt{1 + C^{*2}}]}{1 - \exp[-NTU\sqrt{1 + C^{*2}}]} \quad (S1)$$

where NTU is number of transfer units,

$$NTU = \frac{UA_{HE}}{(\dot{m}C_p)_{\min}} \quad (S2)$$

and

$$C^* = \frac{(\dot{m}C_p)_{\min}}{(\dot{m}C_p)_{\max}} \quad (S3)$$

By solving equations (2, S1 to S3), we obtain heat exchanger effectiveness  $\varepsilon$ , heat capacity ratio  $C^*$ , heat exchanger surface area  $A_{HE}$  and number of transfer units (NTU) for 50 W m<sup>-2</sup> K<sup>-1</sup> overall heat transfer coefficient  $U^2$ , see table S1.

**Table S1** Heat exchanger of reactor system

| $\varepsilon$ / - | $C^*$ / - | NTU / - | $A_{HE}$ / m <sup>2</sup> |
|-------------------|-----------|---------|---------------------------|
| 0.6329            | 0.5734    | 1.5984  | 7.0627                    |

#### S.2 Catalyst Bed

For solving the equations 3 to 5, constants and parameters are required, and they are calculated as follows:

##### Mole Fraction of Components

Mole fractions  $y$  of components N<sub>2</sub>, H<sub>2</sub>, NH<sub>3</sub> and Ar are calculated by using a material balance with conversion  $X$ , inlet molar fraction  $y_{in}$  of the components and stoichiometric coefficients  $v$

of the components and reactants  $r \in \{N_2, H_2\}$  as follows:

$$y_{N_2} = \frac{y_{N_2, in} - \frac{v_{N_2}}{v_r} X_r y_{r, in}}{1 - \frac{v_{NH_3}}{v_r} X_r y_{r, in}} \quad (S4)$$

$$y_{H_2} = \frac{y_{H_2, in} - \frac{v_{H_2}}{v_r} X_r y_{r, in}}{1 - \frac{v_{NH_3}}{v_r} X_r y_{r, in}} \quad (S5)$$

$$y_{NH_3} = \frac{y_{NH_3, in} + \frac{v_{NH_3}}{v_r} X_r y_{r, in}}{1 - \frac{v_{NH_3}}{v_r} X_r y_{r, in}} \quad (S6)$$

$$y_{Ar} = \frac{y_{Ar, in}}{1 - \frac{v_{NH_3}}{v_r} X_r y_{r, in}} \quad (S7)$$

##### Activity

Activity of component  $a_c$  is defined as ratio between the fugacity of components  $c \in \{N_2, H_2, NH_3\}$  at particular arbitrarily chosen state  $f_c$  to the fugacity of pure component  $f_c^*$  at pressure 1 bar and temperature equal to system temperature and is calculated as:

$$a_c = \frac{f_c}{f_c^*} = y_c f_c^o = y_c \phi_c P \quad (S8)$$

where  $f_c^o$  is the fugacity at temperature  $T$  and pressure  $P$  of the system,  $y_c$  molar fraction of components and  $\phi_c$  is the fugacity coefficient of components. For nitrogen<sup>3,4</sup>, hydrogen<sup>3,5</sup> and ammonia<sup>3,4</sup>, the respective fugacity coefficients  $\phi_c$  are as follows:

$$\phi_{N_2} = 0.93431737 + 0.3101804 \times 10^{-3} T + 0.295895 \times 10^{-3} P - 0.270729 \times 10^{-6} T^2 + 0.4775207 \times 10^{-6} P^2 \quad (S9)$$

$$\phi_{H_2} = \exp\{e^{(-3.8402 T^{0.125} + 0.541)} P - e^{(-0.1263 T^{0.5} - 15.980)} P^2 + 300 [e^{(-0.011901 T - 5.941)}] (e^{-P/300} - 1)\} \quad (S10)$$

$$\phi_{NH_3} = 0.1438996 + 0.2028538 \times 10^{-2} T - 0.4487672 \times 10^{-3} P - 0.1142945 \times 10^{-5} \times T^2 + 0.2761216 \times 10^{-6} P^2 \quad (S11)$$

<sup>a</sup> Institute of Energy and Process Systems Engineering, TU Braunschweig, Braunschweig 38106, Germany. Fax: +49 531 3915932; Tel: +49 531 3913030; E-mail: u.krewer@tu-braunschweig.de

<sup>b</sup> International Max Planck Research School for Advanced Methods in Process and Systems Engineering, Magdeburg 39106, Germany.

<sup>c</sup> Department of Chemical, Polymer and Composite Materials Engineering, University of Engineering and Technology, Lahore (KSK - Campus) 39021, Pakistan.

<sup>‡</sup> Full paper available: See DOI: 10.1039/xxxxxxxxxx/

## Reaction Rate Constant

The reaction rate constant is expressed by Arrhenius equation as a function of temperature:

$$k = k_0 e^{-E_a/RT} \quad (\text{S12})$$

where  $k$  is reaction rate constant,  $k_0$  is frequency factor and  $E_a$  activation energy for ammonia decomposition, see table S2 for values.

**Table S2** Catalyst properties<sup>6</sup>

| $\alpha$ | $k_0 / \text{kmol m}^{-3}$ | $E_a / \text{kJ kmol}^{-1}$ |
|----------|----------------------------|-----------------------------|
| 0.5      | $8.8490 \times 10^{14}$    | $1.7056 \times 10^5$        |

## Equilibrium Constant

The equilibrium constant is calculated using the equation developed by Gillespie and Beattie:<sup>7</sup>

$$\log K = -2.691122 \log T - 5.519265 \times 10^{-5} T + 1.848863 \times 10^{-7} T^2 + \frac{2001.6}{T} + 2.67899 \quad (\text{S13})$$

At equilibrium, forward and reverse rates of reaction will be equal, i.e.  $R_{\text{NH}_3} = 0$ , and at equilibrium for  $\alpha = 0.5$ , equation (5) reduces to:

$$K^2 = \frac{a_{\text{NH}_3}^2}{a_{\text{N}_2} a_{\text{H}_2}^3} \quad (\text{S14})$$

where  $K$  is the equilibrium constant. For the equilibrium (EQ) line, equation (S13) and (S14) are solved simultaneously for equilibrium conversion  $X_{\text{EQ}}$  and temperature  $T_{\text{EQ}}$ .

## Specific Heat Capacity

The specific heat capacities  $C_{p_c}$  are expressed as polynomials in  $T$ ; the pressure dependence for real gases  $c \in \{\text{N}_2, \text{H}_2, \text{Ar}\}$  is negligible and calculated as equation (S15) using table S3.

$$C_{p_c} = 4.184 (A + B T + C T^2 + D T^3) \quad (\text{S15})$$

**Table S3** Coefficients of  $C_p$  polynomial for equation (S15)<sup>8</sup>

| Component      | $A$    | $B \times 10^{-2}$ | $C \times 10^{-5}$ | $D \times 10^{-9}$ |
|----------------|--------|--------------------|--------------------|--------------------|
| N <sub>2</sub> | 6.903  | -0.03753           | 0.1930             | -0.6861            |
| H <sub>2</sub> | 6.952  | -0.04576           | 0.09563            | -0.2079            |
| Ar             | 4.9675 |                    |                    |                    |

For NH<sub>3</sub>, pressure dependence is expressed by coefficients of polynomials as linear function of  $P$  by Shah.<sup>9</sup> Equation (S16) is taken

from data at two pressures, 200 and 600 atm.

$$C_{p_{\text{NH}_3}} = 4.184 \{6.5846 - 0.61251 \times 10^{-2} T + 0.23663 \times 10^{-5} T^2 - 1.5981 \times 10^{-9} T^3 + [96.1678 - 0.067571 P + (-0.2225 + 1.6847 \times 10^{-4} P) T + (1.289 \times 10^{-4} - 1.0095 \times 10^{-7} P) T^2]\} \quad (\text{S16})$$

The specific heat capacity for gas mixture consisting of components  $c \in \{\text{N}_2, \text{H}_2, \text{Ar}, \text{NH}_3\}$  in catalyst bed  $C_{p_b}$  is:

$$C_{p_b} = \left( \sum_{c=1}^n y_{c_b} C_{p_{c_b}} \right) / M_{\text{mix}_b} \quad (\text{S17})$$

where  $M_{\text{mix}_b}$  is the average molecular weight of gas mixture.

## Heat of Reaction

The expression for heat of reaction  $\Delta H$  is obtained in a similar manner to specific heat of NH<sub>3</sub> (equation S16) by accommodating pressure dependency of coefficients.<sup>10</sup>

$$\Delta H = 4.184 [- (0.54526 + 846.609 T^{-1} + 459.734 \times 10^6 T^{-3}) P - 5.34685 T - 0.2525 \times 10^{-3} T^2 + 1.69197 \times 10^{-6} T^3 - 9157.09] \quad (\text{S18})$$

## S.3 Ammonia Synthesis Loop

The material balance for ammonia synthesis loop (figure S1) is defined by equations S19 to S33. The components material balance around the splitter is given as follows:

$$\dot{m}_c \textcircled{2} = \dot{m}_c \textcircled{5} - \dot{m}_c \textcircled{6} \quad (\text{S19})$$

where components  $c \in \{\text{N}_2, \text{H}_2, \text{NH}_3, \text{Ar}\}$  concentration in streams  $\textcircled{2}$ ,  $\textcircled{5}$  and  $\textcircled{6}$  are same, i.e.  $x_c \textcircled{2} = x_c \textcircled{5} = x_c \textcircled{6}$  and  $y_c \textcircled{2} = y_c \textcircled{5} = y_c \textcircled{6}$ , as purging is carried out by splitting stream  $\textcircled{5}$  into two streams. Therefore,

$$\dot{m}_c \textcircled{2} = (1 - p) \dot{m}_c \textcircled{5} \quad (\text{S20})$$

where  $p$  is defined as ratio between stream  $\textcircled{6}$  and stream  $\textcircled{5}$ :

$$p = \frac{\dot{m}_c \textcircled{6}}{\dot{m}_c \textcircled{5}} = \frac{\dot{m}_c \textcircled{6}}{\dot{m}_c \textcircled{5}} \quad (\text{S21})$$

The material balance around the separator for 100% pure NH<sub>3</sub> net product ( $y_{\text{NH}_3} \textcircled{7} = x_{\text{NH}_3} \textcircled{7} = 1$ ) and components  $c \in \{\text{N}_2, \text{H}_2, \text{Ar}\}$  is given as follows:

$$\dot{m}_c \textcircled{4} = \dot{m}_c \textcircled{5} \quad (\text{S22})$$

The material balance for components around the mixer is stated as follows:

$$\dot{m}_c \textcircled{3} = \dot{m}_c \textcircled{2} + \dot{m}_c \textcircled{1} \quad (\text{S23})$$

where  $\dot{m}$  is mass flow rate for components  $c \in \{N_2, H_2, NH_3, Ar\}$  in streams ①, ② and ③. For  $NH_3$  free fresh feed ( $y_{NH_3①} = x_{NH_3①} = 0$ ), equation S23 reduces and resulted as follows:

$$\dot{m}_{NH_3③} = \dot{m}_{NH_3②} \quad (S24)$$

Substituting equation S24 into S20 results in the following:

$$\dot{m}_{NH_3③} = (1 - p) \dot{m}_{NH_3⑤} \quad (S25)$$

In addition, the mass flow rate of components  $c \in \{N_2, H_2, NH_3, Ar\}$  in streams ⑤  $\in \{1, 2, 3, 4, 5, 6, 7\}$  of synthesis loop can be expressed as follows:

$$\dot{m}_c⑤ = x_c⑤ \dot{m}⑤ \quad (S26)$$

where  $x$  is components mass fraction.

By combining equations S19, S21, S23, S22 and S26, we get generalised equation for components  $c \in \{N_2, H_2, Ar\}$ :

$$\dot{m}_c③ - \dot{m}_c④ + p \dot{m}_c④ - x_c① \dot{m}① = 0 \quad (S27)$$

For fresh feed ① consisting of  $N_2$ ,  $H_2$  and Ar, where  $N_2$  is supplied along with 2 mol % (0.285 wt %) of Ar, see section 2.2. Thus,

$$x_{Ar①} = 0.0285x_{N_2①} \quad (S28)$$

$$x_{H_2①} = 1 - x_{N_2①} - x_{Ar①} \quad (S29)$$

By inserting equations S28 and S29 into equation S27 for Ar and  $H_2$ . The mass balance of components  $c \in \{N_2, H_2, Ar\}$  for overall synthesis loop from equation S27 expressed as follows:

$$\dot{m}_{N_2}③ - \dot{m}_{N_2}④ + p \dot{m}_{N_2}④ - x_{N_2}① \dot{m}① = 0 \quad (S30)$$

$$\dot{m}_{H_2}③ - \dot{m}_{H_2}④ + p \dot{m}_{H_2}④ - (1 - 1.0285x_{N_2①}) \dot{m}① = 0 \quad (S31)$$

$$\dot{m}_{Ar}③ - \dot{m}_{Ar}④ + p \dot{m}_{Ar}④ - 0.0285x_{N_2①} \dot{m}① = 0 \quad (S32)$$

By solving equations S30, S31 and S32 simultaneously,  $p$ ,  $x_{N_2①}$  and  $\dot{m}①$  can be expressed.

The overall total material balance for ammonia synthesis loop is given as follows:

$$\dot{m}① = \dot{m}⑥ + \dot{m}⑦ \quad (S33)$$

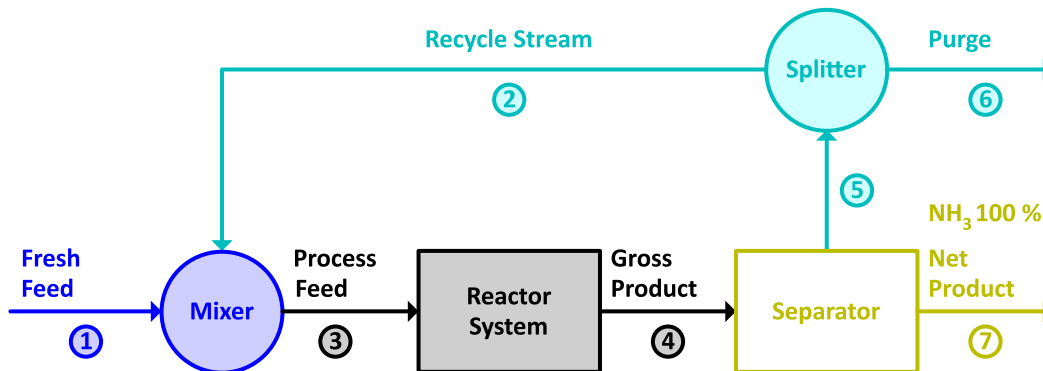

Fig. S1 Block diagram of ammonia synthesis loop

## S.4 Simulation Data

**Table S4** Temperatures and conversions of the reactor system for normal operation and operation at the boundary of the operating envelope

| Process Variables                                          | Operating Envelope |      | Bed-1                   |        | Bed-2  |        | Bed-3  |        |        |
|------------------------------------------------------------|--------------------|------|-------------------------|--------|--------|--------|--------|--------|--------|
|                                                            |                    |      | in                      | out    | in     | out    | in     | out    |        |
| Normal Operation<br>(See table 1)                          |                    |      | $T / K$                 | 673.00 | 773.00 | 673.00 | 772.93 | 673.00 | 760.01 |
|                                                            |                    |      | $X_{H_2} / \%$          | 0.00   | 11.31  | 7.50   | 19.19  | 14.06  | 24.68  |
|                                                            |                    |      | $X_{N_2} / \%$          | 0.00   | 11.31  | 7.50   | 19.19  | 14.06  | 24.68  |
|                                                            |                    |      | $N_2 / \text{mol } \%$  | 22.71  | 21.23  | 21.74  | 20.10  | 20.84  | 19.26  |
|                                                            |                    |      | $H_2 / \text{mol } \%$  | 68.12  | 63.69  | 65.24  | 60.31  | 62.54  | 57.79  |
|                                                            |                    |      | $NH_3 / \text{mol } \%$ | 4.17   | 9.81   | 7.84   | 14.11  | 11.28  | 17.32  |
|                                                            |                    |      | $Ar / \text{mol } \%$   | 5.00   | 5.27   | 5.18   | 5.48   | 5.34   | 5.63   |
| $P$<br>/ bar                                               | 194.32             | Low  | $T / K$                 | 662.50 | 740.50 | 655.63 | 739.38 | 657.12 | 743.42 |
|                                                            | 213.91             | High | $X_{H_2} / \%$          | 0.00   | 8.97   | 5.95   | 15.88  | 11.64  | 22.17  |
| $Y_{Ar} \textcircled{3}$<br>/ mol %                        | 0.00               | Low  | $T / K$                 | 679.05 | 803.00 | 688.81 | 792.20 | 682.48 | 769.56 |
|                                                            | 12.73              | High | $X_{H_2} / \%$          | 0.00   | 13.78  | 9.13   | 21.14  | 15.49  | 26.09  |
| $Y_{NH_3} \textcircled{3}$<br>/ mol %                      | 0.00               | Low  | $T / K$                 | 679.23 | 785.50 | 680.55 | 784.75 | 680.19 | 769.86 |
|                                                            | 12.73              | High | $X_{H_2} / \%$          | 0.00   | 11.51  | 7.62   | 19.26  | 14.11  | 24.53  |
| $Y_{NH_3} \textcircled{3}$<br>/ mol %                      | 3.39               | Low  | $T / K$                 | 654.04 | 724.85 | 646.50 | 723.56 | 648.50 | 730.05 |
|                                                            | 4.53               | High | $X_{H_2} / \%$          | 0.00   | 8.74   | 5.79   | 15.64  | 11.46  | 22.21  |
| $H_2:N_2 \textcircled{3}$<br>/ mol of $H_2$ : mol of $N_2$ | 1.18:2.82          | Low  | $T / K$                 | 678.08 | 803.00 | 688.46 | 790.56 | 682.17 | 768.04 |
|                                                            | 3.05:0.95          | High | $X_{H_2} / \%$          | 0.00   | 13.83  | 9.16   | 20.98  | 15.38  | 25.78  |
| $\dot{m} \textcircled{3}$<br>/ kg h <sup>-1</sup>          | 3.39               | Low  | $T / K$                 | 662.96 | 739.98 | 655.42 | 739.57 | 656.93 | 744.14 |
|                                                            | 4.53               | High | $X_{H_2} / \%$          | 0.00   | 8.89   | 5.89   | 15.89  | 11.65  | 22.32  |
| $H_2:N_2 \textcircled{3}$<br>/ mol of $H_2$ : mol of $N_2$ | 1.18:2.82          | Low  | $T / K$                 | 613.89 | 654.25 | 606.10 | 653.13 | 610.82 | 666.61 |
|                                                            | 3.05:0.95          | High | $X_{H_2} / \%$          | 0.00   | 12.41  | 8.22   | 23.87  | 17.34  | 37.46  |
| $\dot{m} \textcircled{3}$<br>/ kg h <sup>-1</sup>          | 1.18:2.82          | Low  | $X_{N_2} / \%$          | 0.00   | 1.74   | 1.15   | 3.18   | 2.33   | 4.74   |
|                                                            | 3.05:0.95          | High | $T / K$                 | 663.71 | 743.30 | 657.23 | 742.38 | 658.67 | 745.33 |
| $T \textcircled{3}$<br>/ K                                 | 527.78             | Low  | $X_{H_2} / \%$          | 0.00   | 8.98   | 5.95   | 15.84  | 11.61  | 21.98  |
|                                                            | 707.61             | High | $X_{N_2} / \%$          | 0.00   | 9.61   | 6.37   | 17.00  | 12.46  | 23.65  |
| $T \textcircled{3}$<br>/ K                                 | 527.78             | Low  | $T / K$                 | 675.49 | 803.00 | 687.54 | 787.20 | 677.98 | 763.95 |
|                                                            | 707.61             | High | $X_{H_2} / \%$          | 0.00   | 14.20  | 9.41   | 21.06  | 15.44  | 25.97  |
| $T \textcircled{3}$<br>/ K                                 | 519.41             | Low  | $T / K$                 | 664.02 | 743.10 | 657.24 | 741.97 | 658.74 | 745.81 |
|                                                            | 536.84             | High | $X_{H_2} / \%$          | 0.00   | 9.08   | 6.01   | 16.04  | 11.75  | 22.36  |
| $T \textcircled{3}$<br>/ K                                 | 519.41             | Low  | $T / K$                 | 661.08 | 742.07 | 654.67 | 741.03 | 655.66 | 743.25 |
|                                                            | 536.84             | High | $X_{H_2} / \%$          | 0.00   | 9.30   | 6.16   | 16.39  | 12.01  | 22.72  |
| $T \textcircled{3}$<br>/ K                                 | 519.41             | Low  | $T / K$                 | 686.02 | 803.00 | 696.22 | 792.28 | 692.55 | 772.56 |
|                                                            | 536.84             | High | $X_{H_2} / \%$          | 0.00   | 13.05  | 8.65   | 19.82  | 14.52  | 24.22  |

## Nomenclature

### List of Symbols

|            |                                                         |
|------------|---------------------------------------------------------|
| $A$        | Constant for heat capacity / -                          |
| $a$        | Activity / -                                            |
| $A_{HE}$   | Surface area for heat transfer / $m^2$                  |
| $B$        | Constant for heat capacity / -                          |
| $C$        | Constant for heat capacity / -                          |
| $C^*$      | Heat capacity rate ratio / -                            |
| $C_p$      | Specific heat capacity / $kJ\ kmol^{-1}\ K^{-1}$        |
| $D$        | Constant for heat capacity / -                          |
| $E_a$      | Activation energy / $kJ\ kmol^{-1}$                     |
| $f$        | Fugacity / -                                            |
| $K$        | Equilibrium constant / $bar^{-2}$                       |
| $k$        | Reaction rate constant / $kmol\ m^{-3}\ h^{-1}$         |
| $k_0$      | Frequency factor / $kmol\ m^{-3}\ h^{-1}$               |
| $M$        | Molecular weight / $kg\ kmol^{-1}$                      |
| $\dot{m}$  | Mass flow rate / $kg\ h^{-1}$                           |
| NTU        | Number of transfer units / -                            |
| $P$        | Pressure / bar                                          |
| $R$        | Universal gas constant / $8.314\ kJ\ kmol^{-1}\ K^{-1}$ |
| $R_{NH_3}$ | Rate of reaction / $kmol\ m^{-3}\ h^{-1}$               |
| $U$        | Overall heat transfer coefficient / $W\ m^{-2}\ K^{-1}$ |
| $x$        | Mass fraction / -                                       |
| $y$        | Mole fraction / -                                       |
| $Y$        | Concentration / mol %                                   |

### Greek Symbols

|               |                                  |
|---------------|----------------------------------|
| $\alpha$      | Constant / 0.5                   |
| $\nu$         | Stoichiometric coefficient / -   |
| $\phi$        | Fugacity coefficient / -         |
| $\varepsilon$ | Heat exchanger effectiveness / - |

### Superscripts

|     |                                                   |
|-----|---------------------------------------------------|
| *   | At a particular arbitrarily chosen standard state |
| $o$ | At temperature and pressure of system             |

### Subscripts

|   |                  |
|---|------------------|
| 2 | Reverse reaction |
|---|------------------|

|     |              |
|-----|--------------|
| $b$ | Catalyst bed |
| $c$ | Component    |
| in  | Inlet        |
| max | Maximum      |
| min | Minimum      |
| mix | Gas mixture  |
| out | Outlet       |
| $r$ | Reactant     |
| $S$ | Stream       |
| $s$ | Shell side   |
| $t$ | Tube side    |

## References

- 1 S. Kakaç, H. Liu and A. Pramuanjaroenkij, *Heat Exchangers: Selection, Rating, and Thermal Design*, CRC Press, 3rd edn, 2012.
- 2 O. Frank, *Chem. Eng.*, 1974, **81**, 126–127.
- 3 H. W. Cooper, *Hydrocarbon Process.*, 1967, **46**, 159–160.
- 4 R. H. Newton, *Ind. & Eng. Chem.*, 1935, **27**, 302–306.
- 5 R. S. Herbert and R. W. David, *Am. J. Sci.*, 1964, **262**, 918–929.
- 6 D. C. Dyson and J. M. Simon, *Ind. Eng. Chem. Fundam.*, 1968, **7**, 605–610.
- 7 L. J. Gillespie and J. A. Beattie, *Phys. Rev.*, 1930, **36**, 743.
- 8 O. A. Hougen and K. M. Watson, *Chemical Process Principles, Part III*, Wiley, New York, NY, 1962, pp. 805–901.
- 9 M. Shah, *Ind. Eng. Chem.*, 1967, **59**, 72–83.
- 10 A. T. Mahfouz, S. S. Elshishini and S. S. E. H. Elnashaie, *Modelling, Simulation & Control. B*, 1987, **10**, 1–17.
